# Supplementary material for: Smart chitosan Schiff base ferrite: a dual-action visible light photocatalyst for dye degradation and antimicrobial defense
Source: Royal Society of Chemistry journal article supplement (doi:10.1039/d4nj03947e), 2024-01-01
Supplement: d4nj03947e1.pdf [file d4nj03947e1.pdf]

## Supporting Information

### Smart Chitosan Schiff Base Ferrite: A Dual-Action Photocatalyst for Dye Degradation and Antimicrobial Defense

Musaib Y. Wani\*<sup>1</sup>, Shakeel A. Shah\*<sup>1</sup>

<sup>1</sup>Department of Chemistry, NIT Srinagar, Hazratbal-190006, Jammu & Kashmir, India.

\*Corresponding email: musaibchem48@gmail.com

**Fig. S1:** EDAX analysis of SBXIII

**Fig. S2:** EDAX analysis of SBXIII@NiFe

**Fig. S3:** XRD graphs of SBXIII@NiFe before and after photodegradation

**Fig.S4:** FTIR graphs of SBXIII@NiFe before and after photodegradation

**Fig. S5:** XPS graphs of SBXIII@NiFe before and after photodegradation

**Fig. S6:** Antibacterial activity plates of SBXIII@NiFe and SBXIII@NiFe showing different zone of inhibition (mm)

**Fig. S7:** VSM analysis of Nickel Ferrite (NiFe)

**Fig. S8:** Photocatalytic degradation of Tetracycline drug.

**Fig. S9:** TEM images of synthesized photocatalyst

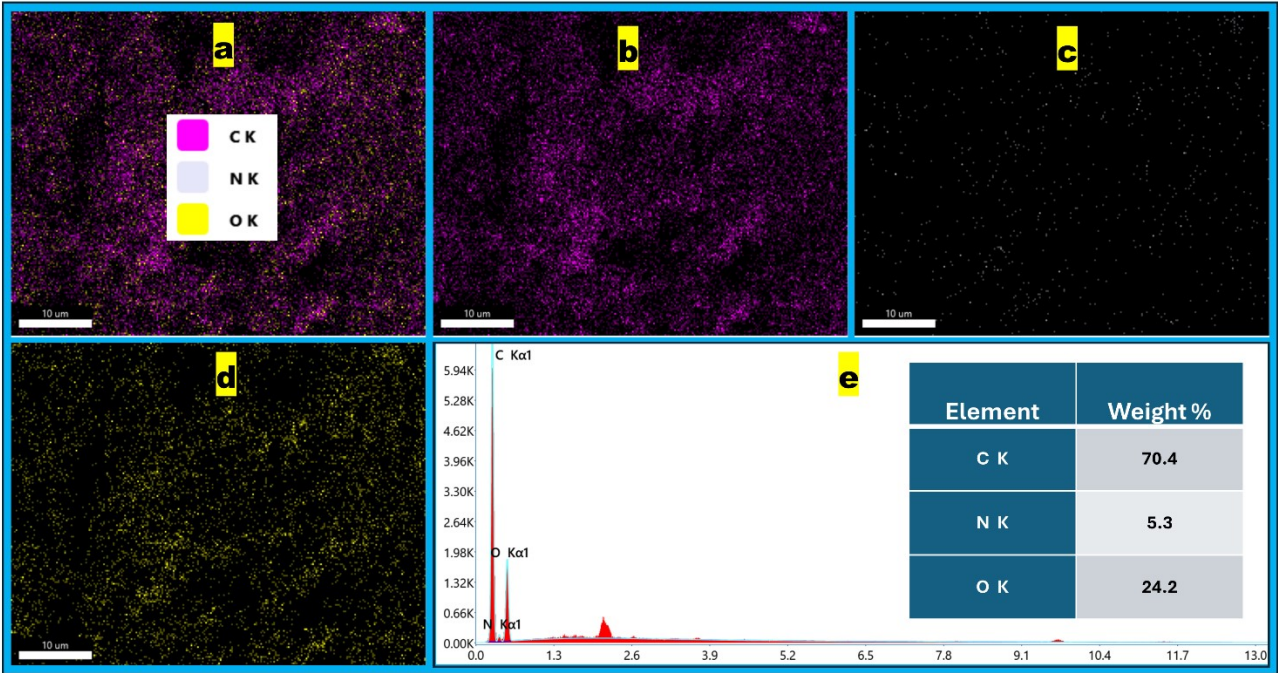

**Fig. S1:** EDAX analysis of SBXIII showing elements like C, N, O present in Chitosan Schiff-Base

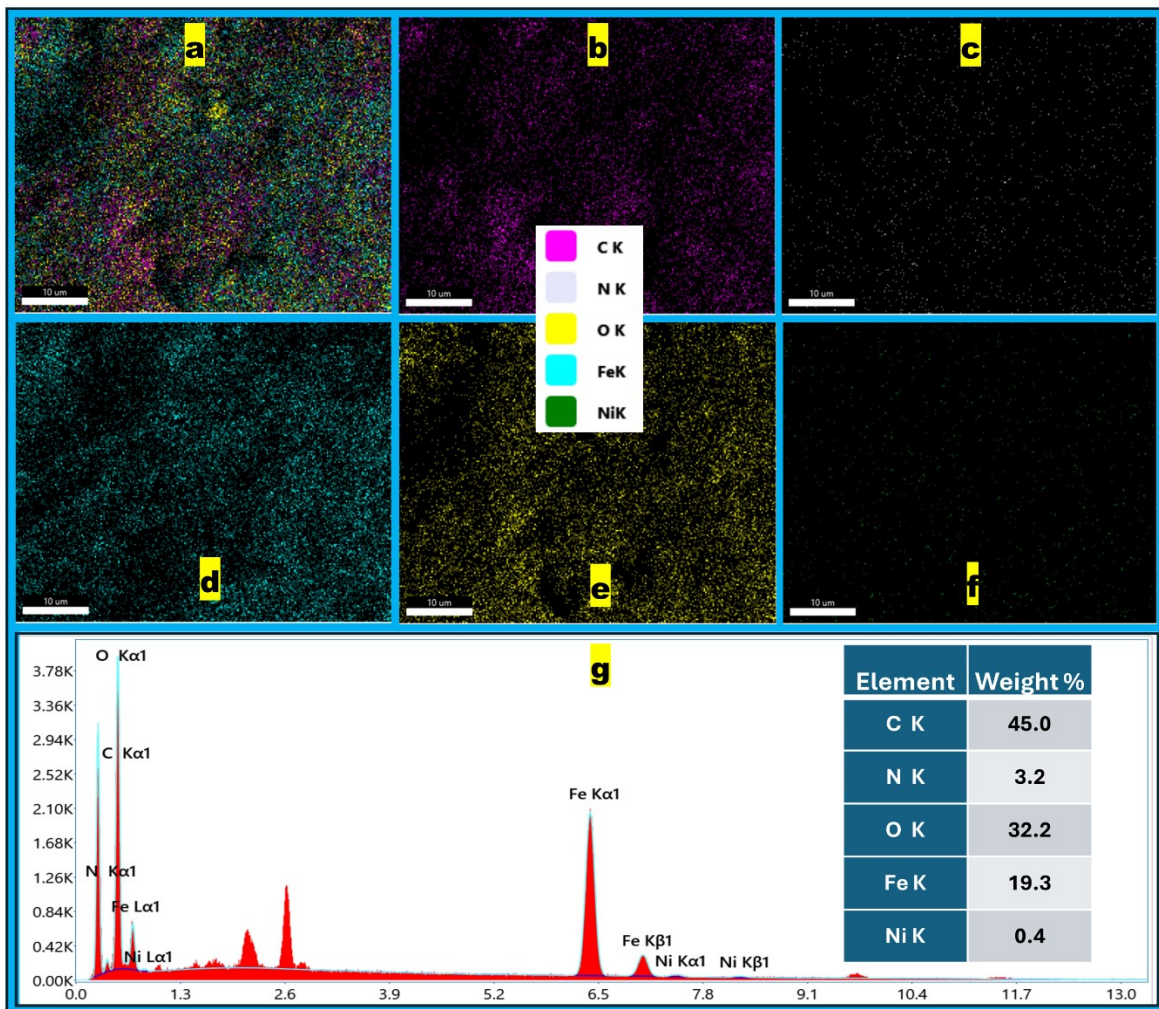

**Fig. S2:** EDAX analysis of SBXIII@NiFe showing elements like C, N, O, Fe and Ni present in Chitosan Schiff-Base Nanocomposite

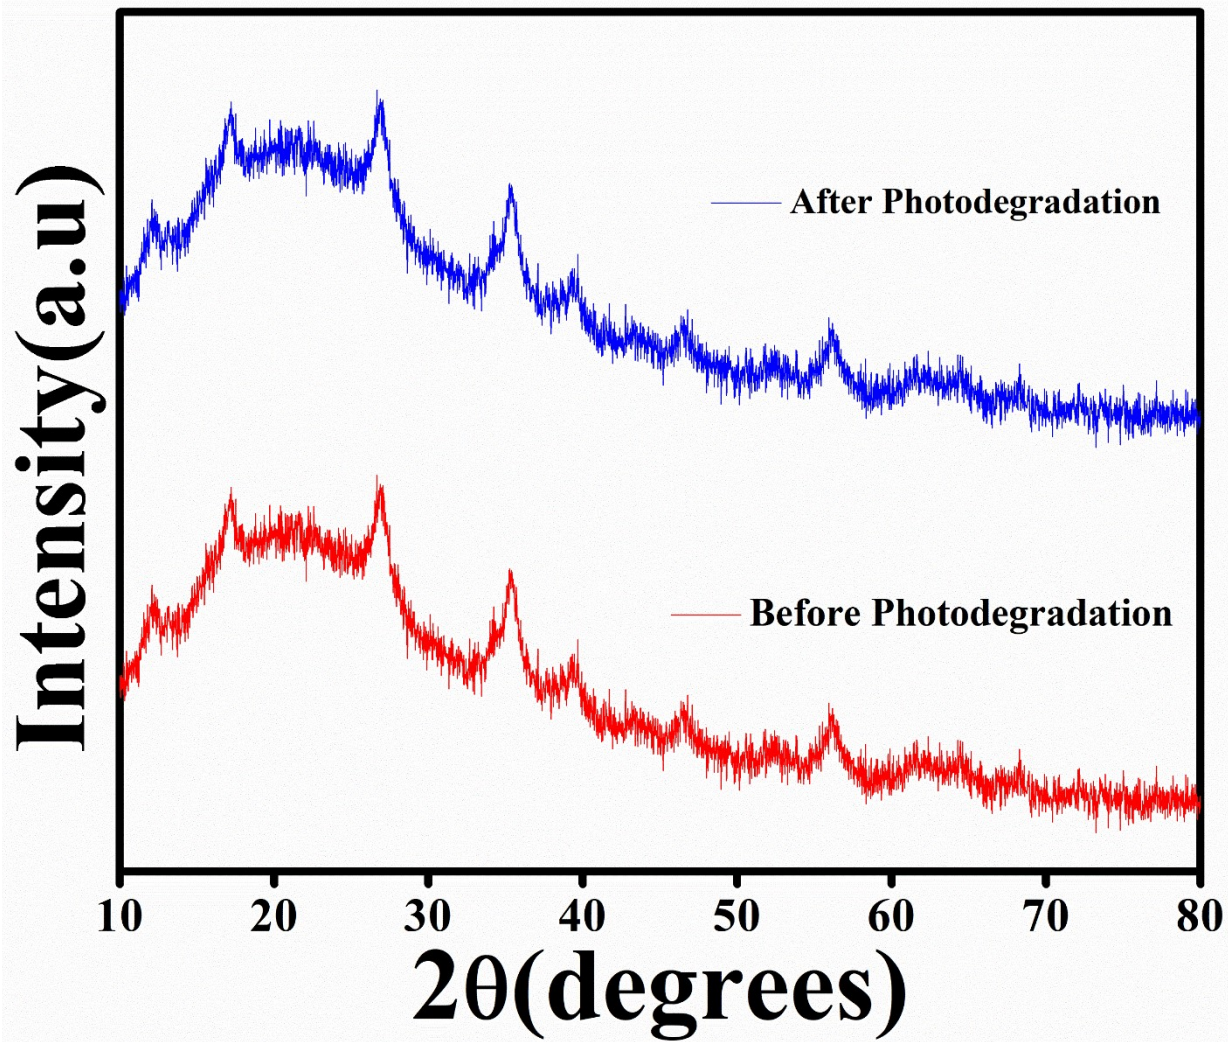

Fig. S3: XRD graphs of SBXIII@NiFe before and after photodegradation



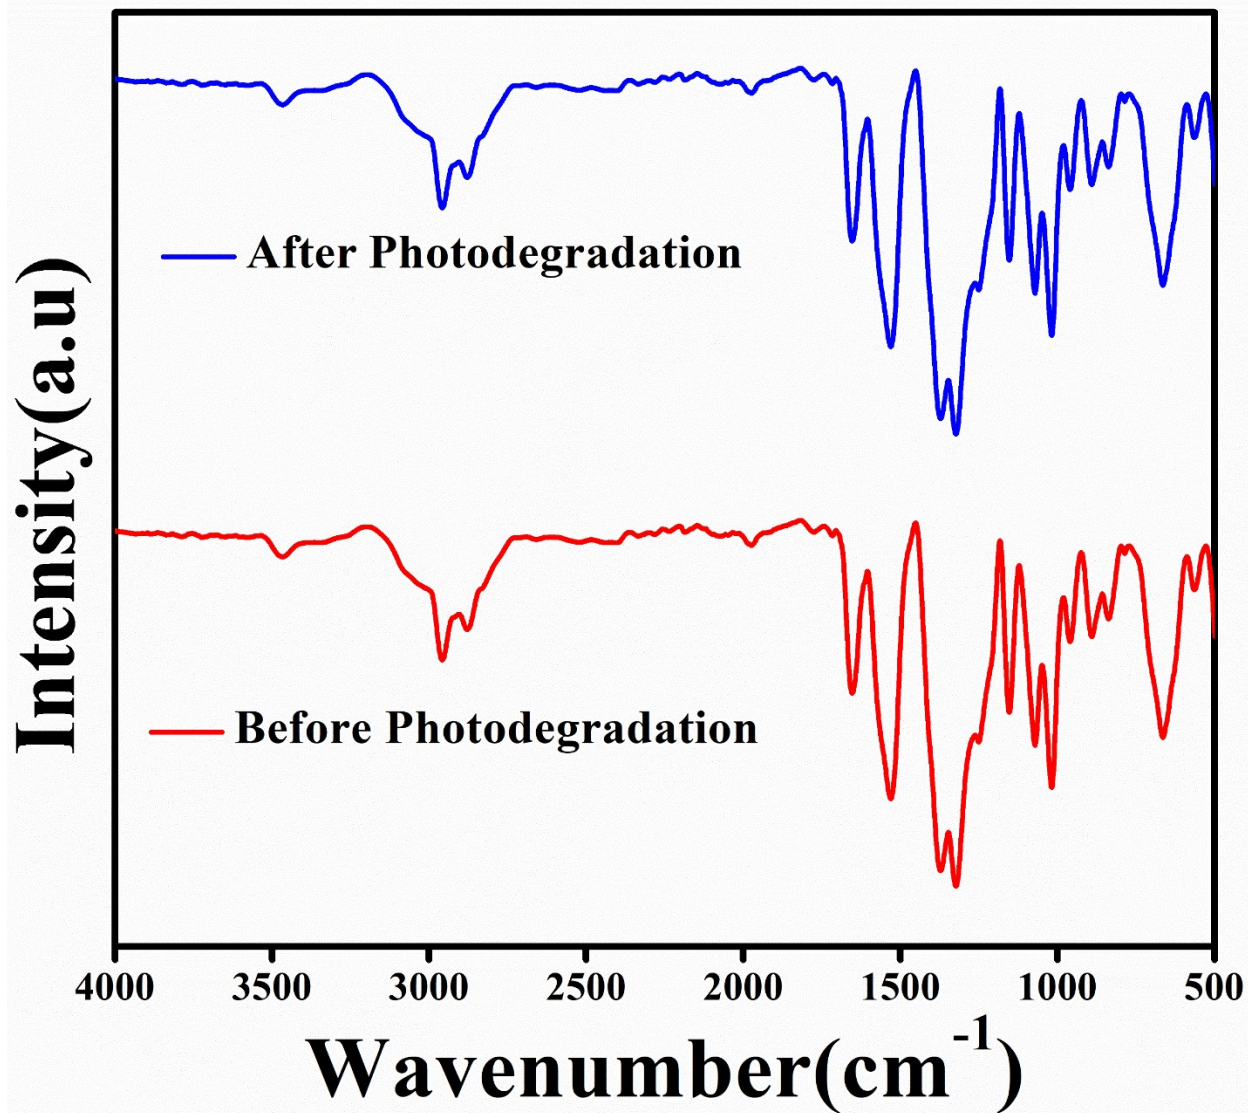

Fig. S4: FTIR graphs of SBXIII@NiFe before and after photodegradation

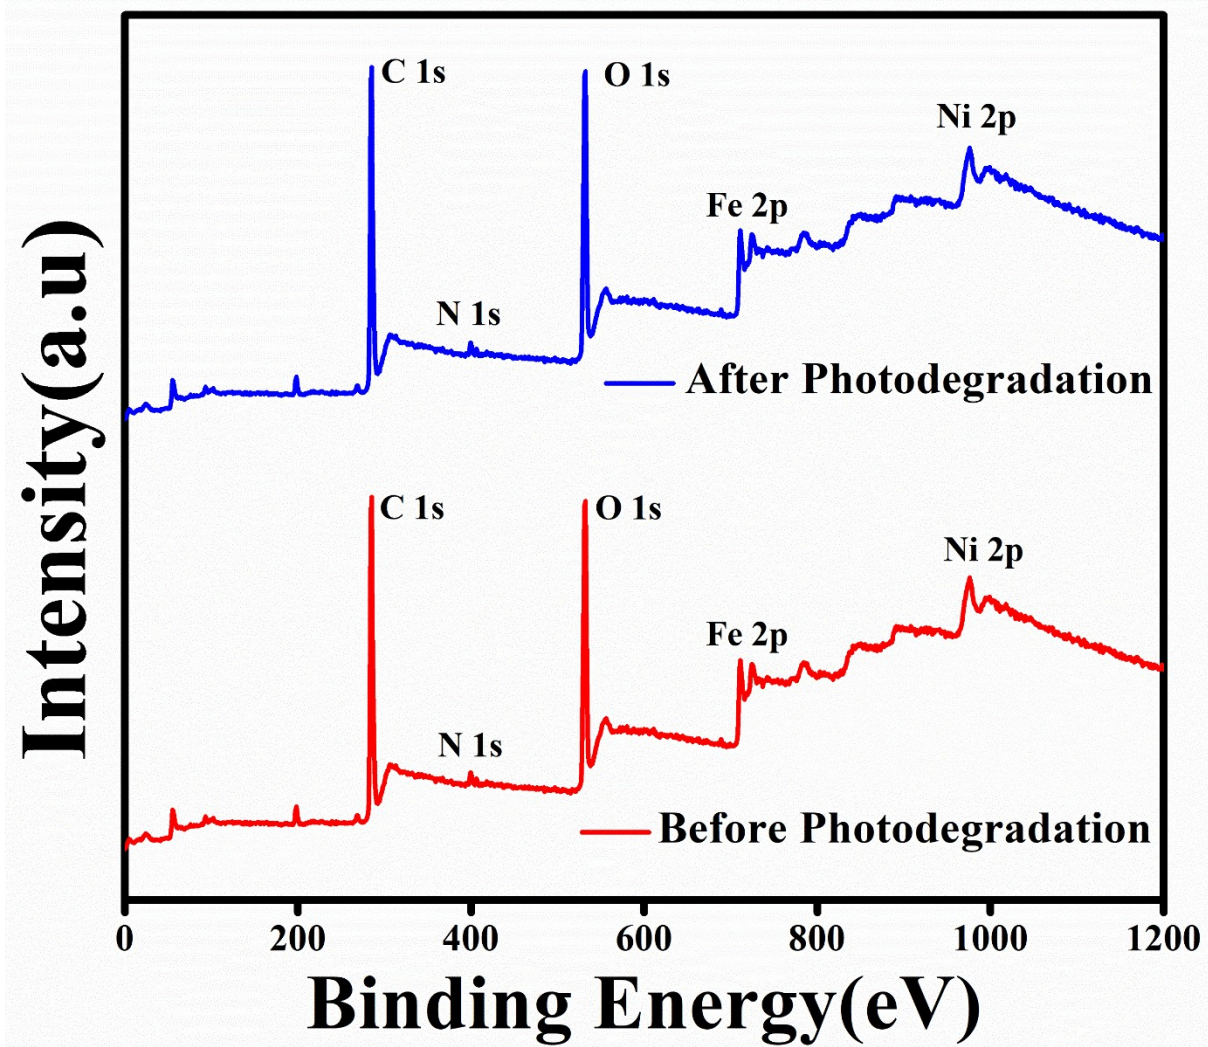

Fig. S5: XPS graphs of SBXIII@NiFe before and after photodegradation

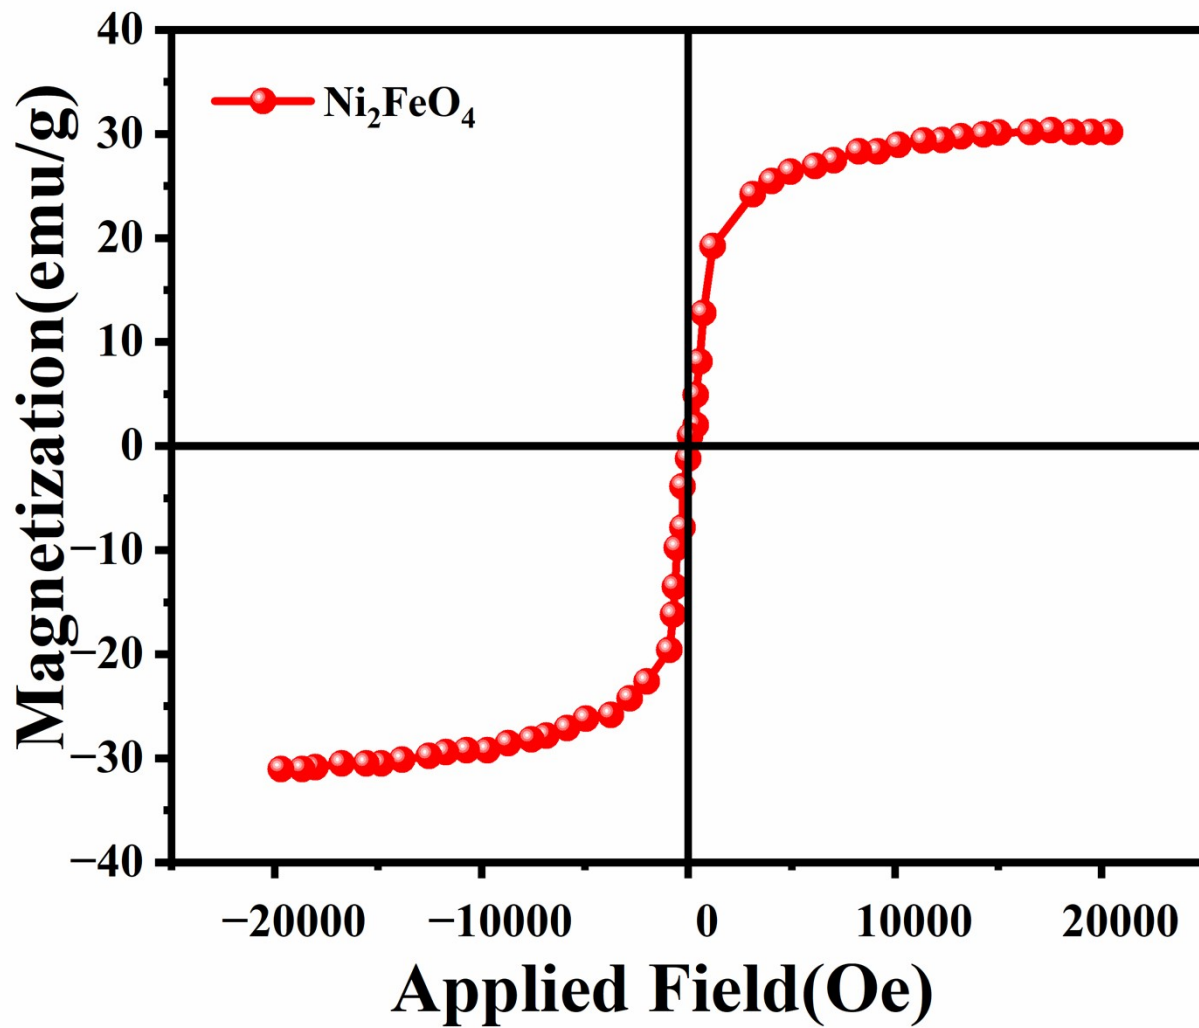

Fig. S6: VSM analysis of Nickel Ferrite (NiFe)



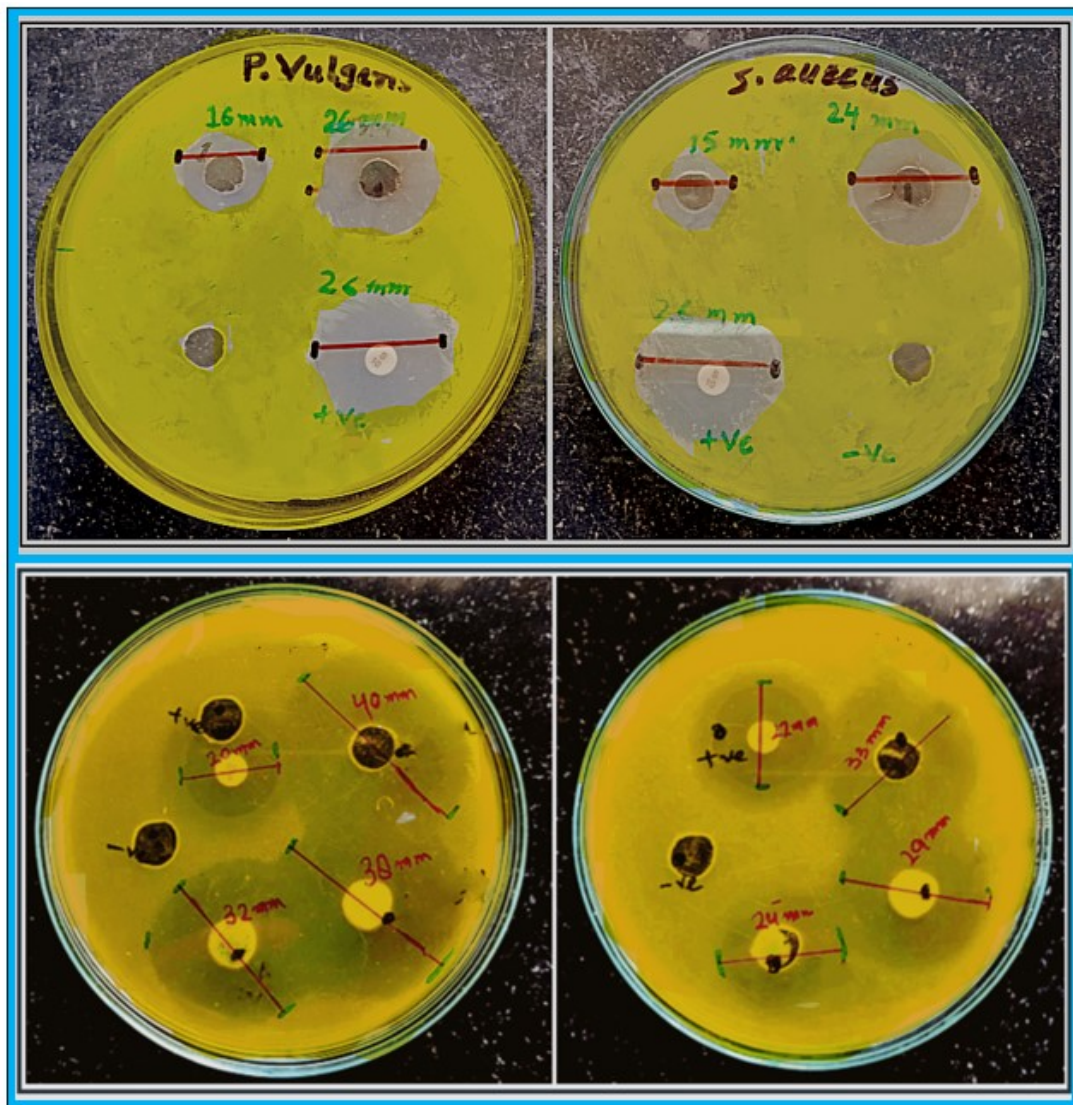

**Fig. S7:** Antibacterial activity plates of SBXIII@NiFe and SBXIII@NiFe showing different zone of inhibition (mm)



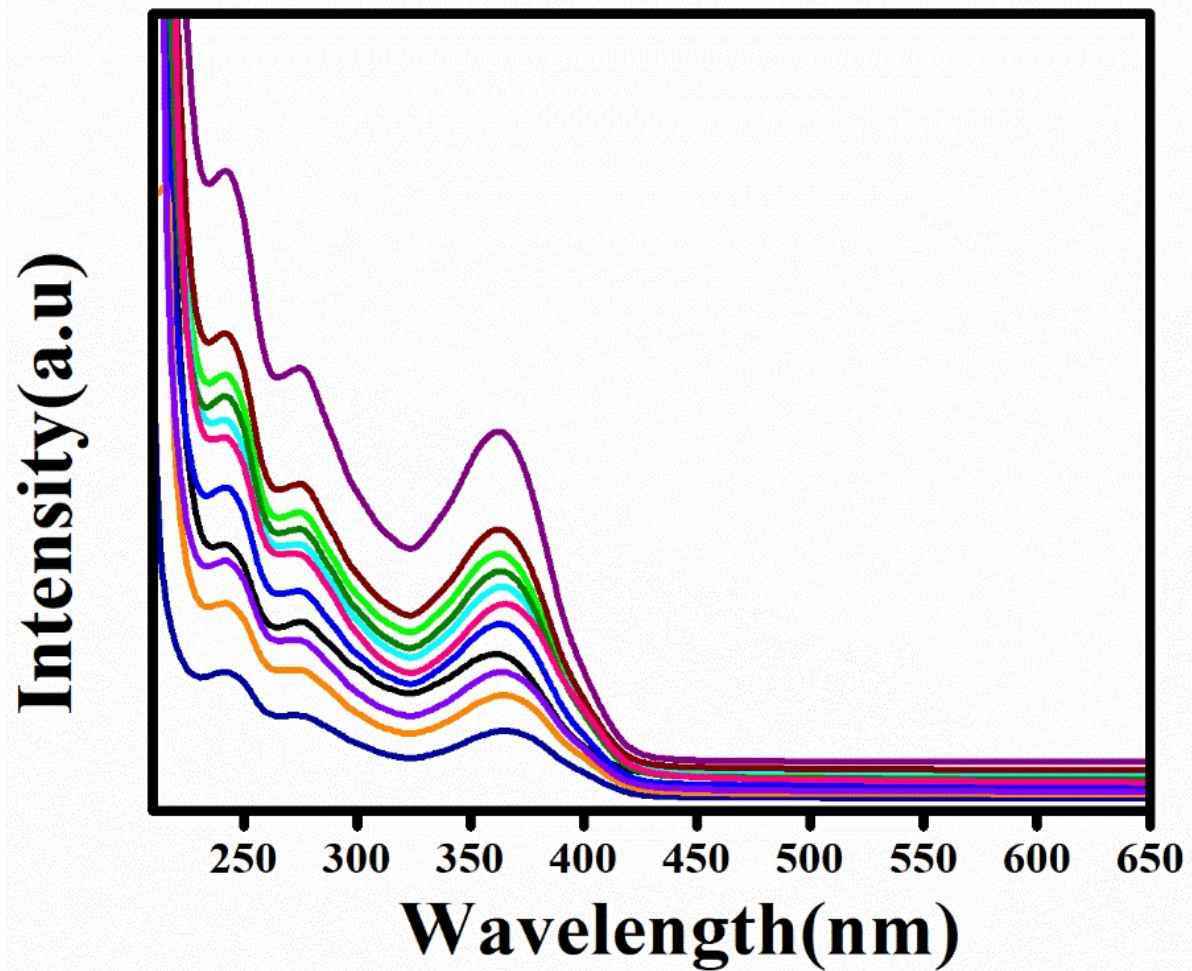

**Fig. S8:** Photocatalytic degradation of Tetracycline drug.

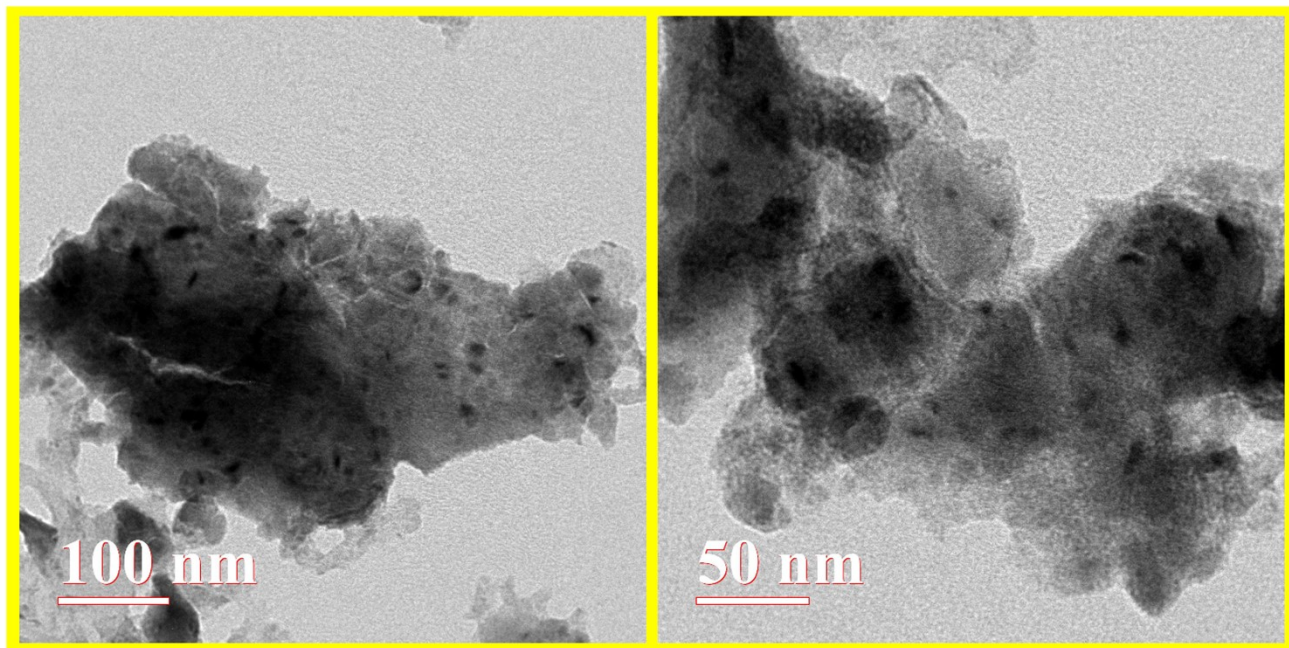

**Fig. S9:** TEM images of synthesized photocatalyst
